# Supplementary material for: Magnetic turbulence in a table-top laser-plasma relevant to astrophysical scenarios
Source: PubMed Central journal article supplement (PMC5497062; doi:10.1038/ncomms15970), 2017-06-30
Supplement: ncomms15970-s4.pdf [file ncomms15970-s4.pdf]

*Editorial Note:*

*This manuscript has been previously reviewed at another journal that is not operating a transparent peer review scheme. This document only contains reviewer comments and rebuttal letters for versions considered at Nature Communications.*
